# Supplementary material for: Aufeis of the Indigirka river basin (Russia): the databasefrom historical data and recent Landsat images
Source: Copernicus journal article supplement (doi:10.5194/essd-2018-99), 2018-08-31

## Aufeises (naleds) of the North-East of Russia: GIS catalogue for the Indigirka River basin (Russia)

The GIS database contains the combination of historical data on aufeises (naleds) distribution and their characteristics for the Indigirka River basin from two sources. Historical data origins from the Cadastre of naleds of the North-East of the USSR published in 1958. Other sources are Landsat images for the period 2013-2017.

The database includes:

1. The characteristics of aufeises from the Cadastre of naleds of the North-East of the USSR (1958). The data are stored in file Aufeis\_Kadastr.txt

### Original version:

|            |                                                                                                                                                                |
|------------|----------------------------------------------------------------------------------------------------------------------------------------------------------------|
| OBJECTID   | Index number                                                                                                                                                   |
| Auf_Topo_K | Aufeis area (km <sup>2</sup> ) from the Cadastre (1958). If the data was missing, the area was calculated by topographic maps (1980) scale 1: 200 000          |
| kadastr    | Index of the aufeis in the Cadastre (1958) (it contains 0 if the aufeis was missing in the Cadastre, but found in the topographic map (1980) scale 1: 200 000) |
| kad_map_nu | Index of the Cadastre (1958) map                                                                                                                               |
| topo       | Presence of the aufeis at topographic map (0 – missing, 1 – present)                                                                                           |
| kad_map    | Presence of the aufeis in the Cadastre (0 – missing, 1 – present)                                                                                              |
| toponumber | Nomenclature of the topographic map sheet                                                                                                                      |
| data       | Date of fixing the presence of ice within the aufeis                                                                                                           |
| X_geo      | Longitude, degree                                                                                                                                              |
| Y_geo      | Latitude, degree                                                                                                                                               |
| Altitude   | Height above sea level (determined by Aster GDEM), m                                                                                                           |
| comment    | Comments (mainly typos in the Cadastre map, or the method of determining aufeis area)                                                                          |
| PolygonID  | Index of aufeis by Landsat images (if aufeis is not at the images, the value is missing)                                                                       |
| Polygon_di | Minimum distance between the aufeis from the Cadastre and the same aufeis from Landsat image (m)                                                               |

### Suggestions for enhancing the self explanation skills of the attribute names:

|                           |                                                                                                                                                                |
|---------------------------|----------------------------------------------------------------------------------------------------------------------------------------------------------------|
| OBJECTID                  | Index number                                                                                                                                                   |
| aufeis data source        | Consider to add one general group assignment for this full data set (useful if both data sets are visualized, e.g. in google earth) e.g. aufeis from cadastre  |
| aufeis area cadastre sqkm | Aufeis area (km <sup>2</sup> ) from the Cadastre (1958). If the data was missing, the area was calculated by topographic maps (1980) scale 1: 200 000          |
| aufeis index cadastre     | Index of the aufeis in the Cadastre (1958) (it contains 0 if the aufeis was missing in the Cadastre, but found in the topographic map (1980) scale 1: 200 000) |
| cadastre index            | Index of the Cadastre (1958) map                                                                                                                               |
| aufeis_in_topo            | Presence of the aufeis at topographic map (0 – missing, 1 – present)                                                                                           |
| aufeis_in_map             | Presence of the aufeis in the Cadastre (0 – missing, 1 – present)                                                                                              |
| toponumber                | Nomenclature of the topographic map sheet                                                                                                                      |
| date                      | Date of fixing the presence of ice within the aufeis                                                                                                           |
| Long                      | Longitude, degree                                                                                                                                              |
| Lat                       | Latitude, degree                                                                                                                                               |
| elevation                 | Height above sea level (determined by Aster GDEM), m                                                                                                           |

|             |                                                                                                  |
|-------------|--------------------------------------------------------------------------------------------------|
| comment     | Comments (mainly typos in the Cadastre map, or the method of determining aufeis area)            |
| cross index | cross index of aufeis derived from Landsat (if aufeis is not in Landsat, the value is missing)   |
| distance_m  | Minimum distance between the aufeis from the Cadastre and the same aufeis from Landsat image (m) |

2. The characteristics of aufeises from Landsat images (2013-2017). The data are stored in file Aufeis\_Landsat.txt

Original version:

|          |                                                                                                                                                                                        |
|----------|----------------------------------------------------------------------------------------------------------------------------------------------------------------------------------------|
| OBJECTID | Index number                                                                                                                                                                           |
| WRS2ID   | The Landsat scene identifier in the WRS2 graph of the US Geological Survey (USGS). The first three digits indicate the column number, the last three digits represent the line number. |
| Date     | The date of image                                                                                                                                                                      |
| Comment  | Additional information, for example, if the aufeis was partly covered by clouds and additional images were used to estimate the area                                                   |
| ID       | Identifier of aufeis by Landsat images (key field for the reference to the Cadastre data=PolygonID)                                                                                    |
| Area_km  | Aufeis area by Landsat image, km <sup>2</sup>                                                                                                                                          |

Suggestions for enhancing the self explanation skills of the attribute names

|                    |                                                                                                                                                                                        |
|--------------------|----------------------------------------------------------------------------------------------------------------------------------------------------------------------------------------|
| OBJECTID           | Index number                                                                                                                                                                           |
| aufeis data source | Consider to add one general group assignment for this full data set (useful if both data sets are visualized, e.g. in google earth) e.g. aufeis from Landsat                           |
| Landsat_WRS2ID     | The Landsat scene identifier in the WRS2 graph of the US Geological Survey (USGS). The first three digits indicate the column number, the last three digits represent the line number. |
| Landsat_date       | The date of image                                                                                                                                                                      |
| Comment            | Additional information, for example, if the aufeis was partly covered by clouds and additional images were used to estimate the area                                                   |
| cross index        | Identifier of aufeis by Landsat images (key field for the reference to the Cadastre data=PolygonID)                                                                                    |
| aufeis_area_sqkm   | Aufeis area by Landsat image, km <sup>2</sup>                                                                                                                                          |
| Add elevation      |                                                                                                                                                                                        |

Example of a snapshot visualization of aufeis data and attribute names in google earth

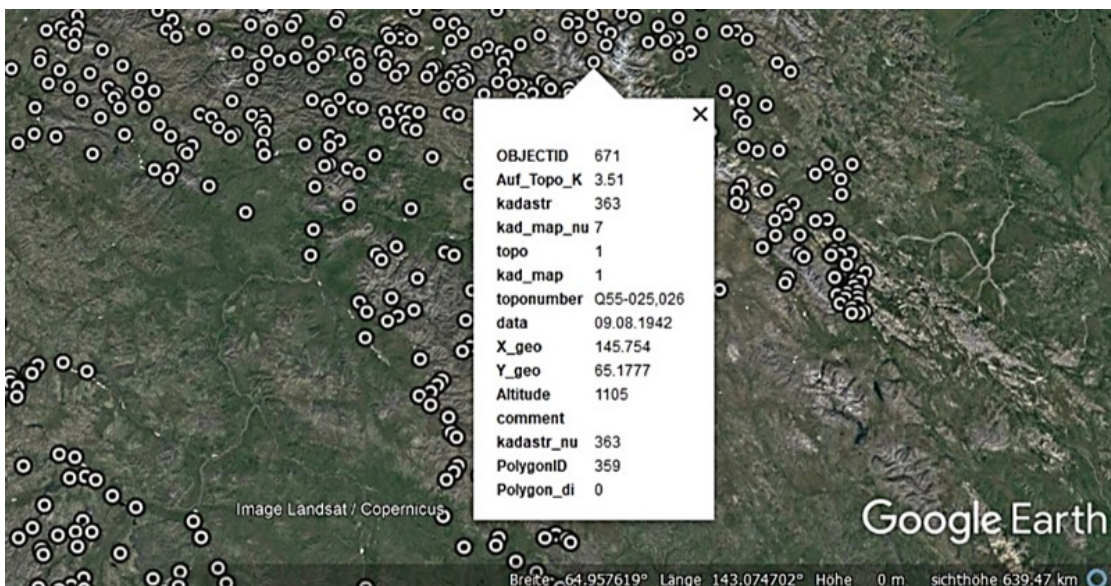

Supplement: Supplementary file [file essd-2018-99-RC1-supplement.pdf]
